# Supplementary material for: Qualitative study of practices and challenges when making a diagnosis of asthma in primary care
Source: PubMed Central journal article supplement (PMC6637121; doi:10.1038/s41533-019-0140-z), 2019-07-17
Supplement: 41533_2019_140_MOESM1_ESM.pdf [file 41533_2019_140_MOESM1_ESM.pdf]

## Supplementary information

### Qualitative study of practices and challenges when making a diagnosis of asthma in primary care

**Supplementary Table 1: Topic guide**

| Opening question                                                                                                                                                                                                                                                                                                                                                                                                                                                                                                                                                                                                                                                 | Prompts                                                                                                                                                                                                                                                                                                                                                                                                                                                                                                                                                                                                                                                                                                                                                                                                                                                                                          |
|------------------------------------------------------------------------------------------------------------------------------------------------------------------------------------------------------------------------------------------------------------------------------------------------------------------------------------------------------------------------------------------------------------------------------------------------------------------------------------------------------------------------------------------------------------------------------------------------------------------------------------------------------------------|--------------------------------------------------------------------------------------------------------------------------------------------------------------------------------------------------------------------------------------------------------------------------------------------------------------------------------------------------------------------------------------------------------------------------------------------------------------------------------------------------------------------------------------------------------------------------------------------------------------------------------------------------------------------------------------------------------------------------------------------------------------------------------------------------------------------------------------------------------------------------------------------------|
| How long have you worked at the practice?                                                                                                                                                                                                                                                                                                                                                                                                                                                                                                                                                                                                                        |                                                                                                                                                                                                                                                                                                                                                                                                                                                                                                                                                                                                                                                                                                                                                                                                                                                                                                  |
| <p>Can you tell me how you diagnose patients in asthma?</p> <p>Can you tell me about a time you have diagnosed asthma?</p> <p>Are you confident to make a diagnosis of asthma?</p> <p>What about the case stood out for you?<br/>(Nurses: Would you be comfortable making a diagnosis of asthma?)</p> <p>What do you think would be important for making a diagnosis?)</p> <p>Can you think of another scenario where the patient/process was quite different?</p> <p>Why do use that strategy?</p> <p>How has your strategy changed over the years?</p> <p>How have you come to use this approach?</p> <p>What has influenced this approach over the years?</p> | <ul style="list-style-type: none"> <li>• Explain strategy</li> <li>• History</li> <li>• Exam (wheeze on auscultation)</li> <li>• Do you classify patients according to probability of asthma (high, intermediate, low)?</li> <li>• Do you classify patients into types of asthma a (topic, late-onset, non-allergic, exercise induced, cough variant, obesity related, occupational)</li> <li>• Children</li> <li>• What has influenced your approach? (Guidelines, experience, learnt from colleague)</li> <li>• Have you refined your strategy over the years (what changes, why did you make those changes)</li> <li>• If not (haven't refined), why?</li> <li>• What was the role of Quality Outcomes Framework (QOF) in diagnosing asthma, if any?</li> <li>• No strategy-how do you make diagnosis?</li> </ul>                                                                             |
| Verify or explore differentials                                                                                                                                                                                                                                                                                                                                                                                                                                                                                                                                                                                                                                  |                                                                                                                                                                                                                                                                                                                                                                                                                                                                                                                                                                                                                                                                                                                                                                                                                                                                                                  |
| <p>In a situation where you have a patient who is likely to have asthma, what do you do next?</p> <p>What tests are available to you?</p> <p>To confirm?</p> <p>If tests/trial of treatment are normal?</p>                                                                                                                                                                                                                                                                                                                                                                                                                                                      | <ul style="list-style-type: none"> <li>• Tests (which tests- Peak flow, spirometry, challenge tests, FeNO)</li> <li>• Tests availability (where are the tests done?)</li> <li>• Do you use spirometry? Do you always use spirometry?</li> <li>• Spirometry- how do you access spirometry, what is the form of results, Do you always use reversibility tests, Who interprets the test, if nurse practitioner does it, is he/she trained?</li> <li>• What do you do if spirometry is normal but there is a high clinical suspicion?</li> <li>• Trial of treatment-do you use a trial of treatment. What would the trial of treatment be? When do you review after a trial of treatment?</li> <li>• Review diagnosis - after how long?</li> <li>• I have been hearing that QOF made GPs and nurse do more spirometry. What do you think will happen now that QOF is no longer in place?</li> </ul> |

| Opening question                                                                                                                                                                              | Prompts                                                                                                                                                                                                                                                                                                                                                                                                                                                                                                                                                                                                                                                                                                                                                                                                                                           |
|-----------------------------------------------------------------------------------------------------------------------------------------------------------------------------------------------|---------------------------------------------------------------------------------------------------------------------------------------------------------------------------------------------------------------------------------------------------------------------------------------------------------------------------------------------------------------------------------------------------------------------------------------------------------------------------------------------------------------------------------------------------------------------------------------------------------------------------------------------------------------------------------------------------------------------------------------------------------------------------------------------------------------------------------------------------|
| <b>After initial work up (suspected / confirmed diagnosis)</b>                                                                                                                                |                                                                                                                                                                                                                                                                                                                                                                                                                                                                                                                                                                                                                                                                                                                                                                                                                                                   |
| Is there anything you do after a diagnosis has been confirmed?                                                                                                                                | <ul style="list-style-type: none"> <li>• Code: Description of what evidence diagnosis is based on, suspected asthma</li> <li>• The review process</li> </ul>                                                                                                                                                                                                                                                                                                                                                                                                                                                                                                                                                                                                                                                                                      |
| What challenges are there in making an accurate and timely diagnosis of asthma?                                                                                                               | <ul style="list-style-type: none"> <li>• Appointments-10 minute time limit</li> <li>• Atypical subtypes/presentations: obese patients, patients with GORD, post viral cough</li> <li>• Conflicting guidelines</li> <li>• Availability of tests</li> <li>• Challenges with reviewing patients-How do you code patients that get better with trial treatment but don't come back?</li> <li>• Referral to secondary care/relationship with secondary care</li> <li>• Reviewing or questioning existing diagnoses</li> <li>• How do you tackle these challenges?</li> </ul>                                                                                                                                                                                                                                                                           |
| <b>Misdiagnosis generally</b>                                                                                                                                                                 |                                                                                                                                                                                                                                                                                                                                                                                                                                                                                                                                                                                                                                                                                                                                                                                                                                                   |
| Are you aware of any issues around misdiagnosis of asthma?                                                                                                                                    | <ul style="list-style-type: none"> <li>• Under diagnosis</li> <li>• Over diagnosis</li> </ul>                                                                                                                                                                                                                                                                                                                                                                                                                                                                                                                                                                                                                                                                                                                                                     |
| <p>What do you think would help to reduce issues around misdiagnosis of asthma in the future?</p> <p>Is there anything you do in your practice that you think should be widely available?</p> | <ul style="list-style-type: none"> <li>• Diagnostic support services? centralised hub to capture all necessary tests needed for a diagnosis</li> <li>• What are your thoughts on sending patients to a community based respiratory assessment unit as opposed to the hospital for spirometry when you are unsure of the diagnosis?</li> <li>• Would you be happy to send patients even if you were sure of the diagnosis?</li> <li>• Mobile technology-e.g. recording patients</li> <li>• New tests: FeNO</li> <li>• What do you think of a software that will help to diagnose asthma</li> <li>• Decision support tools: Clinical prediction calculator e.g. ASSIGN score that predicts people likely to develop heart disease in the next 10 years</li> <li>• What features of a clinical prediction rule make you likely to use it?</li> </ul> |
| <b>Any other ideas about improving asthma diagnosis?</b>                                                                                                                                      |                                                                                                                                                                                                                                                                                                                                                                                                                                                                                                                                                                                                                                                                                                                                                                                                                                                   |

**Supplementary Table 2: Coding framework**

| <b>Name</b>                                            | <b>Sources</b> | <b>References</b> |
|--------------------------------------------------------|----------------|-------------------|
| <b>Approach to diagnosis</b>                           | 0              | 0                 |
| Confidence about making diagnosis                      | 7              | 15                |
| Probability of asthma                                  | 12             | 29                |
| Clinical history                                       | 14             | 28                |
| Examination                                            | 10             | 12                |
| Investigations                                         | 0              | 0                 |
| Spirometry                                             | 15             | 53                |
| Peak flow                                              | 14             | 42                |
| Other                                                  | 7              | 9                 |
| Trial of treatment                                     | 15             | 53                |
| Referral to secondary care                             | 15             | 36                |
| Asthma phenotypes                                      | 6              | 6                 |
| Asthma codes                                           | 4              | 5                 |
| <b>Factors influencing the diagnostic process</b>      | 0              | 0                 |
| Patient population                                     | 0              | 0                 |
| Children                                               | 14             | 29                |
| Old enough or elderly                                  | 9              | 12                |
| Guidelines                                             | 11             | 24                |
| Knowledge or Clinical experience                       | 5              | 7                 |
| QOF                                                    | 7              | 10                |
| Smoking status                                         | 6              | 6                 |
| Patient preference                                     | 2              | 2                 |
| Organisation of healthcare                             | 0              | 0                 |
| Training or updates                                    | 7              | 9                 |
| Role in practice                                       | 6              | 11                |
| Compliance to do test                                  | 2              | 4                 |
| Professional's preference                              | 1              | 1                 |
| <b>Challenges in the diagnostic process</b>            | 0              | 0                 |
| Guidelines                                             | 5              | 9                 |
| Time                                                   | 8              | 16                |
| Failure to attend appointments                         | 6              | 9                 |
| Patient age group - children                           | 9              | 15                |
| Patient age - older patients                           | 4              | 5                 |
| Variable nature of asthma                              | 9              | 13                |
| New patients with existing diagnoses                   | 1              | 1                 |
| Lack of gold standard test                             | 6              | 7                 |
| overlap with COPD and other diagnoses                  | 9              | 16                |
| Possible mild or exercise induced asthma               | 4              | 5                 |
| Fear of diagnostic labelling                           | 3              | 4                 |
| Clinical variety of asthma                             | 2              | 2                 |
| <b>Misdiagnosis</b>                                    | 0              | 0                 |
| Perceptions on misdiagnosis of asthma                  | 14             | 25                |
| Sources of overdiagnosis                               | 11             | 28                |
| Sources of underdiagnoses                              | 4              | 4                 |
| Inhalers without diagnosis                             | 5              | 11                |
| Revisiting diagnosis                                   | 10             | 17                |
| Suboptimal coding                                      | 2              | 3                 |
| <b>Opinions on future approach to asthma diagnosis</b> | 4              | 6                 |
| Clinical prediction calculator                         | 15             | 23                |
| Diagnostic hubs                                        | 15             | 25                |
| Opinions on FeNO                                       | 12             | 23                |
| Asthma as a priority                                   | 3              | 5                 |
| Revisit asthma diagnoses                               | 2              | 2                 |
| Education                                              | 2              | 2                 |
| Definitive diagnostic process                          | 4              | 5                 |
| Use objective tools                                    | 2              | 2                 |

**Supplementary Table 3: COREQ (COnsolidated criteria for REporting Qualitative research) Checklist**

| Topic                                          | Item No. | Guide Questions/Description                                                                                                                              | Reported on Page No.      |
|------------------------------------------------|----------|----------------------------------------------------------------------------------------------------------------------------------------------------------|---------------------------|
| <b>Domain 1: Research team and reflexivity</b> |          |                                                                                                                                                          |                           |
| <i>Personal characteristics</i>                |          |                                                                                                                                                          |                           |
| Interviewer/facilitator                        | 1        | Which author/s conducted the interview or focus group?                                                                                                   | 19                        |
| Credentials                                    | 2        | What were the researcher's credentials? E.g. PhD, MD                                                                                                     | 19                        |
| Occupation                                     | 3        | What was their occupation at the time of the study?                                                                                                      | 19                        |
| Gender                                         | 4        | Was the researcher male or female?                                                                                                                       | 17                        |
| Experience and training                        | 5        | What experience or training did the researcher have?                                                                                                     | 19                        |
| <i>Relationship with participants</i>          |          |                                                                                                                                                          |                           |
| Relationship established                       | 6        | Was a relationship established prior to study commencement?                                                                                              | 19                        |
| Participant knowledge of the interviewer       | 7        | What did the participants know about the researcher? e.g. personal goals, reasons for doing the research                                                 | 19                        |
| Interviewer characteristics                    | 8        | What characteristics were reported about the interviewer/facilitator? e.g. Bias, assumptions, reasons and interests in the research topic                | 19                        |
| <b>Domain 2: Study design</b>                  |          |                                                                                                                                                          |                           |
| <i>Theoretical framework</i>                   |          |                                                                                                                                                          |                           |
| Methodological orientation and Theory          | 9        | What methodological orientation was stated to underpin the study? e.g. grounded theory, discourse analysis, ethnography, phenomenology, content analysis | 20                        |
| <i>Participant selection</i>                   |          |                                                                                                                                                          |                           |
| Sampling                                       | 10       | How were participants selected? e.g. purposive, convenience, consecutive, snowball                                                                       | 19                        |
| Method of approach                             | 11       | How were participants approached? e.g. face-to-face, telephone, mail, Email                                                                              | 19                        |
| Sample size                                    | 12       | How many participants were in the study?                                                                                                                 | 5                         |
| Non-participation                              | 13       | How many people refused to participate or dropped out? Reasons?                                                                                          | 19                        |
| <i>Setting</i>                                 |          |                                                                                                                                                          |                           |
| Setting of data collection                     | 14       | Where was the data collected? e.g. home, clinic, workplace                                                                                               | 20                        |
| Presence of non-participants                   | 15       | Was anyone else present besides the participants and researchers?                                                                                        | 20                        |
| Description of sample                          | 16       | What are the important characteristics of the sample? e.g. demographic data, date                                                                        | 5, 19, Tables 1&2         |
| <i>Data collection</i>                         |          |                                                                                                                                                          |                           |
| Interview guide                                | 17       | Were questions, prompts, guides provided by the authors? Was it pilot tested?                                                                            | 19, Supplementary Table 1 |
| Repeat interviews                              | 18       | Were repeat interviews carried out? If yes, how many?                                                                                                    | 20                        |
| Audio/visual recording                         | 19       | Did the research use audio or visual recording to collect the data?                                                                                      | 20                        |
| Field notes                                    | 20       | Were field notes made during and/or after the interview or focus group?                                                                                  | 20                        |
| Duration                                       | 21       | What was the duration of the interviews or focus group?                                                                                                  | 5                         |
| Data saturation                                | 22       | Was data saturation discussed?                                                                                                                           | 18                        |
| Transcripts returned                           | 23       | Were transcripts returned to participants for comment and/or correction?                                                                                 |                           |
| <b>Domain 3: analysis and findings</b>         |          |                                                                                                                                                          |                           |
| <i>Data analysis</i>                           |          |                                                                                                                                                          |                           |
| Number of data coders                          | 24       | How many data coders coded the data?                                                                                                                     | 20                        |
| Description of the coding tree                 | 25       | Did authors provide a description of the coding tree?                                                                                                    | 5                         |
| Derivation of themes                           | 26       | Were themes identified in advance or derived from the data?                                                                                              | 20                        |
| Software                                       | 27       | What software, if applicable, was used to manage the data?                                                                                               | 20                        |
| Participant checking                           | 28       | Did participants provide feedback on the findings?                                                                                                       |                           |
| Quotations presented                           | 29       | Were participant quotations presented to illustrate the themes/findings? Was each quotation identified? e.g. participant number                          | 5-14                      |
| Data and findings consistent                   | 30       | Was there consistency between the data presented and the findings?                                                                                       |                           |

| Topic                                                                                                                                                                                                                                                                 | Item No. | Guide Questions/Description                                            | Reported on Page No. |
|-----------------------------------------------------------------------------------------------------------------------------------------------------------------------------------------------------------------------------------------------------------------------|----------|------------------------------------------------------------------------|----------------------|
| Clarity of major themes                                                                                                                                                                                                                                               | 31       | Were major themes clearly presented in the findings?                   | 5                    |
| Clarity of minor themes                                                                                                                                                                                                                                               | 32       | Is there a description of diverse cases or discussion of minor themes? | 5-14                 |
| Developed from: Tong A, Sainsbury P, Craig J. Consolidated criteria for reporting qualitative research (COREQ): a 32-item checklist for interviews and focus groups. <i>International Journal for Quality in Health Care</i> . 2007. Volume 19, Number 6: pp. 349–357 |          |                                                                        |                      |
